# Supplementary material
Source: Springer Nature journal article supplement (https://www.springermedizin.de/resource/supplementary/12885_2009_1972_MOESM1_ESM.pdf/9460216)

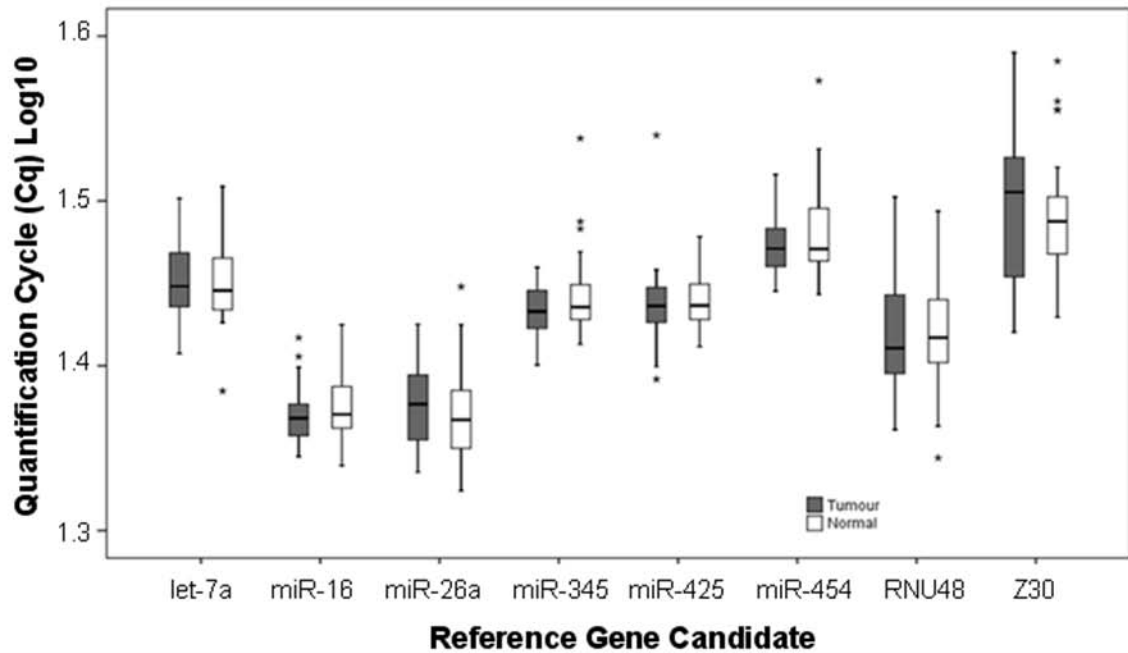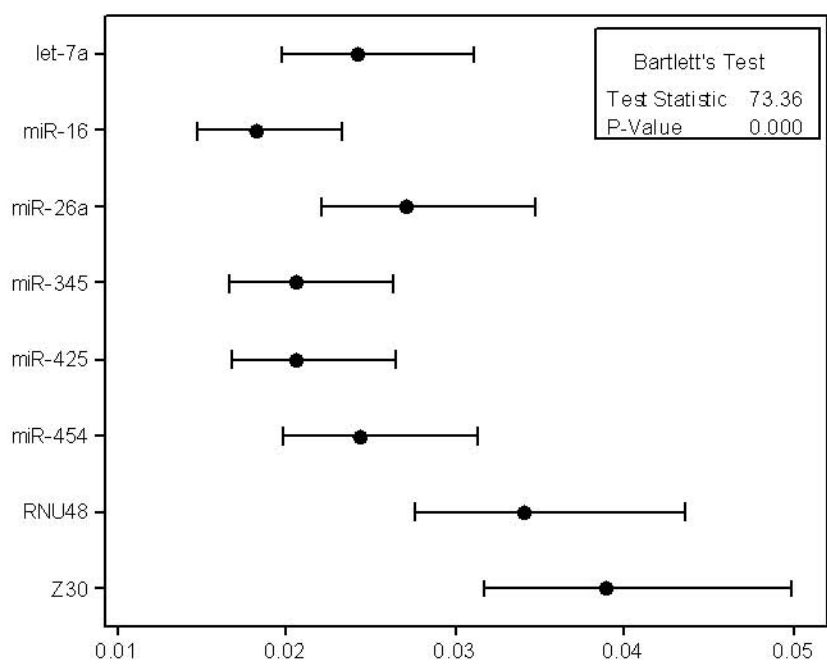

**95% Bonferroni Confidence Intervals for Standard Deviations**

Supplement: MOESM1 [file 9460216]
